# Supplementary material
Source: publisher figshare collection journal article supplement (https://acs.figshare.com/ndownloader/files/5710260)
Supplement: Supplementary file 1 [file 5710260]

# ic980133+.cif

data_[Pt(PPh3)(m2-S)2{W(S2CNEt2)2}2(m2-S)2]
#---------------------------------------------------------------------------
---
_audit_creation_date                  'Tue Mar 18 21:27:40 1997'
_audit_creation_method                'from TEXRAY.INF file'
_audit_update_record                   ?
#---------------------------------------------------------------------------
---
_computing_data_collection            'MSC/AFC Diffractometer Control'
_computing_cell_refinement            'MSC/AFC Diffractometer Control'
_computing_data_reduction             'teXsan: PROCESS (MSC)'
_computing_structure_solution          DIRDIF92 (PATTY)
_computing_structure_refinement       'teXsan: LS (MSC)'
_computing_publication_material       'teXsan: FINISH (MSC)'
#---------------------------------------------------------------------------
---
_cell_length_a                         13.718(3)
_cell_length_b                         12.795(2)
_cell_length_c                         43.798(2)
_cell_angle_alpha                      90
_cell_angle_beta                       95.24(1)
_cell_angle_gamma                      90
_cell_volume                           7654(1)
_cell_formula_units_Z                  8.00
_cell_measurement_temperature          23.0
_cell_measurement_reflns_used          21
_cell_measurement_theta_min            29.16
_cell_measurement_theta_max            29.90
#---------------------------------------------------------------------------
---
_symmetry_cell_setting                 monoclinic
_symmetry_space_group_name_H-M        'C 2/c      '
_symmetry_Int_Tables_number            15
_symmetry_space_group_name_Hall        ?
loop_
_symmetry_equiv_pos_as_xyz
  '   +x,   +y,   +z'
  '   +x,   +y,   +z'
  '   -x,   +y,1/2-z'
  '   -x,   +y,1/2-z'
  '   -x,   -y,   -z'
  '   -x,   -y,   -z'
  '   +x,   -y,1/2+z'
  '   +x,   -y,1/2+z'
#---------------------------------------------------------------------------
---
_exptl_crystal_description            'plate'
_exptl_crystal_colour                 'purple'
_exptl_crystal_size_max                1.500
_exptl_crystal_size_mid                0.500
_exptl_crystal_size_min                0.150
_exptl_crystal_density_diffrn          2.169
_exptl_crystal_density_measured        ?
_exptl_crystal_F000                    4688.00
_exptl_absorpt_coefficient_mu_cm       101.347
_exptl_absorpt_correction_type         empirical
_exptl_absorpt_process_descript        psi-scan
_exptl_absorpt_correction_T_max        0.999
_exptl_absorpt_correction_T_min        0.241
#---------------------------------------------------------------------------
---
_diffrn_special_details                none
_diffrn_ambient_temperature            23.0
_diffrn_radiation_wavelength           0.7107
_diffrn_radiation_type                 MoKalpha
_diffrn_radiation_source              'X-ray tube'
_diffrn_radiation_monochromator        graphite
_diffrn_radiation_detector             ?
_diffrn_measurement_device            'AFC7R'
_diffrn_measurement_method            'omega/2-theta scans'

_diffrn_standards_number              3
_diffrn_standards_interval_count      150
_diffrn_standards_decay_\%             -0.08
loop_
_diffrn_standard_refln_index_h
_diffrn_standard_refln_index_k
_diffrn_standard_refln_index_l
   -1 0 1    -1 -5 1    -1 -7 0  

_diffrn_reflns_number                  14476
_diffrn_reflns_av_R_equivalents        8.59
_diffrn_reflns_av_sigmaI/Inet          ?
_diffrn_reflns_h_min                   -11
_diffrn_reflns_h_max                   16
_diffrn_reflns_k_min                   -1
_diffrn_reflns_k_max                   0
_diffrn_reflns_l_min                   -45
_diffrn_reflns_l_max                   38
_diffrn_theta_min                      ?
_diffrn_theta_max                      27.4925
_diffrn_reflns_reduction_process       ?

_diffrn_orient_matrix_11              -0.02716
_diffrn_orient_matrix_12              -0.03782
_diffrn_orient_matrix_13              -0.01887
_diffrn_orient_matrix_21               0.03797
_diffrn_orient_matrix_22               0.04689
_diffrn_orient_matrix_23              -0.01282
_diffrn_orient_matrix_31               0.05639
_diffrn_orient_matrix_32              -0.04980
_diffrn_orient_matrix_33               0.00226
#---------------------------------------------------------------------------
---
loop_
_atom_type_symbol
_atom_type_oxidation_number
_atom_type_number_in_cell
_atom_type_scat_dispersion_real
_atom_type_scat_dispersion_imag
_atom_type_scat_source
  C  0   224 0.003 0.002    'International Tables'
  H  0   280 0.000 0.000    'International Tables'
  P  0     8 0.102 0.094    'International Tables'
  S  0    64 0.125 0.123    'International Tables'
  Pt 0     8 -1.703 8.390    'International Tables'
  W  0    16 -0.849 6.872    'International Tables'
  N  0    16 0.006 0.003    'International Tables'
#---------------------------------------------------------------------------
---
loop_
_atom_site_label
_atom_site_fract_x
_atom_site_fract_y
_atom_site_fract_z
_atom_site_U_iso_or_equiv
_atom_site_thermal_displace_type
_atom_site_calc_flag
_atom_site_calc_attached_atom
 Pt1    0.20891(5)  0.02825(5)  -0.10294(2) 0.0473      Uij ? ?
 W1     0.22293(6)  0.21040(5)  -0.13715(2) 0.0474      Uij ? ?
 W2     0.22028(6)  0.02464(6)  -0.16635(2) 0.0638      Uij ? ?
 S1     0.2127(3)   0.1979(3)   -0.0876(1)  0.0574      Uij ? ?
 S2     0.1984(4)   -0.1078(3)  -0.1363(1)  0.0794      Uij ? ?
 S3     0.0936(4)   0.1443(3)   -0.1693(1)  0.0697      Uij ? ?
 S4     0.3578(4)   0.1268(4)   -0.1543(1)  0.0763      Uij ? ?
 S5     0.1282(4)   0.3750(3)   -0.1451(1)  0.0712      Uij ? ?
 S6     0.3361(4)   0.3609(3)   -0.1368(1)  0.0817      Uij ? ?
 S7     0.1285(6)   -0.0455(5)  -0.2127(1)  0.1294      Uij ? ?
 S8     0.3315(6)   -0.0629(5)  -0.1991(2)  0.1321      Uij ? ?
 P1     0.2200(3)   -0.0707(3)  -0.0599(1)  0.0438      Uij ? ?
 N1     0.242(1)    0.5463(10)  -0.1421(4)  0.0829      Uij ? ?
 N2     0.237(4)    -0.151(2)   -0.2507(6)  0.1916      Uij ? ?
 C1     0.348(1)    -0.110(1)   -0.0492(4)  0.0450      Uij ? ?
 C2     0.385(1)    -0.119(1)   -0.0203(5)  0.0728      Uij ? ?
 C3     0.484(2)    -0.152(2)   -0.0138(5)  0.0880      Uij ? ?
 C4     0.540(2)    -0.175(2)   -0.0377(6)  0.0862      Uij ? ?
 C5     0.501(2)    -0.165(2)   -0.0672(6)  0.0885      Uij ? ?
 C6     0.407(1)    -0.130(1)   -0.0732(4)  0.0630      Uij ? ?
 C7     0.182(1)    -0.021(1)   -0.0238(3)  0.0424      Uij ? ?
 C8     0.213(1)    0.079(1)    -0.0143(4)  0.0645      Uij ? ?
 C9     0.190(1)    0.118(1)    0.0135(5)   0.0769      Uij ? ?
 C10    0.137(1)    0.061(2)    0.0321(4)   0.0664      Uij ? ?
 C11    0.104(1)    -0.037(2)   0.0225(5)   0.0734      Uij ? ?
 C12    0.129(1)    -0.078(1)   -0.0048(4)  0.0544      Uij ? ?
 C13    0.153(1)    -0.194(1)   -0.0647(3)  0.0379      Uij ? ?
 C14    0.195(1)    -0.290(1)   -0.0562(4)  0.0508      Uij ? ?
 C15    0.141(1)    -0.382(1)   -0.0612(5)  0.0667      Uij ? ?
 C16    0.047(1)    -0.376(1)   -0.0724(5)  0.0753      Uij ? ?
 C17    0.005(1)    -0.283(2)   -0.0808(4)  0.0718      Uij ? ?
 C18    0.058(1)    -0.193(1)   -0.0768(4)  0.0601      Uij ? ?
 C19    0.235(1)    0.446(1)    -0.1399(3)  0.0544      Uij ? ?
 C20    0.155(2)    0.611(1)    -0.1460(5)  0.1000      Uij ? ?
 C21    0.132(2)    0.643(2)    -0.1780(6)  0.1297      Uij ? ?
 C22    0.342(2)    0.602(2)    -0.1435(7)  0.1232      Uij ? ?
 C23    0.383(2)    0.620(2)    -0.1125(8)  0.1771      Uij ? ?
 C24    0.237(2)    -0.098(2)   -0.2233(6)  0.1419      Uij ? ?
 C25    0.155(5)    -0.170(3)   -0.274(1)   0.2930      Uij ? ?
 C26    0.124(5)    -0.262(5)   -0.270(2)   0.2323      Uij ? ?
 C27    0.113(8)    -0.073(8)   -0.295(3)   0.2849      Uij ? ?
 C28    0.327(6)    -0.197(4)   -0.257(1)   0.2637      Uij ? ?
 C29    0.349(7)    -0.289(5)   -0.243(2)   0.3188      Uij ? ?
 C30    0.388(10)   -0.139(7)   -0.267(3)   0.2244      Uij ? ?
 H1     0.3462      -0.1042     -0.0040     0.0859      Uij ? ?
 H2     0.5111      -0.1573     0.0068      0.1067      Uij ? ?
 H3     0.6053      -0.1982     -0.0333     0.1074      Uij ? ?
 H4     0.5390      -0.1828     -0.0835     0.1042      Uij ? ?
 H5     0.3816      -0.1188     -0.0938     0.0720      Uij ? ?
 H6     0.2509      0.1208      -0.0269     0.0776      Uij ? ?
 H7     0.2113      0.1855      0.0198      0.0880      Uij ? ?
 H8     0.1217      0.0883      0.0514      0.0778      Uij ? ?
 H9     0.0643      -0.0762     0.0349      0.0843      Uij ? ?
 H10    0.1094      -0.1470     -0.0104     0.0629      Uij ? ?
 H11    0.2601      -0.2931     -0.0469     0.0577      Uij ? ?
 H12    0.1710      -0.4476     -0.0567     0.0771      Uij ? ?
 H13    0.0085      -0.4384     -0.0745     0.0865      Uij ? ?
 H14    -0.0608     -0.2809     -0.0895     0.0797      Uij ? ?
 H15    0.0280      -0.1280     -0.0826     0.0680      Uij ? ?
 H16    0.1013      0.5734      -0.1395     0.1163      Uij ? ?
 H17    0.1656      0.6725      -0.1338     0.1163      Uij ? ?
 H18    0.1849      0.6828      -0.1846     0.1327      Uij ? ?
 H19    0.1231      0.5821      -0.1905     0.1327      Uij ? ?
 H20    0.0741      0.6834      -0.1798     0.1327      Uij ? ?
 H21    0.3846      0.5590      -0.1539     0.1231      Uij ? ?
 H22    0.3325      0.6666      -0.1540     0.1231      Uij ? ?
 H23    0.3892      0.5552      -0.1018     0.1709      Uij ? ?
 H24    0.4456      0.6513      -0.1127     0.1709      Uij ? ?
 H25    0.3411      0.6650      -0.1024     0.2127      Uij ? ?
 H26    0.1087      -0.2686     -0.2490     0.2292      Uij ? ?
 H27    0.0673      -0.2753     -0.2831     0.2292      Uij ? ?
 H28    0.1738      -0.3107     -0.2735     0.2292      Uij ? ?
 H29    0.0959      -0.0172     -0.2824     0.2570      Uij ? ?
 H30    0.1613      -0.0506     -0.3078     0.2570      Uij ? ?
 H31    0.0562      -0.0952     -0.3077     0.2570      Uij ? ?
 H32    0.2987      -0.3384     -0.2493     0.2942      Uij ? ?
 H33    0.4096      -0.3139     -0.2489     0.2942      Uij ? ?
 H34    0.3522      -0.2795     -0.2217     0.2942      Uij ? ?
 H35    0.4446      -0.1784     -0.2709     0.1977      Uij ? ?
 H36    0.3610      -0.1086     -0.2858     0.1977      Uij ? ?
 H37    0.4052      -0.0861     -0.2526     0.2692      Uij ? ?

loop_
_atom_site_aniso_label
_atom_site_aniso_U_11
_atom_site_aniso_U_22
_atom_site_aniso_U_33
_atom_site_aniso_U_12
_atom_site_aniso_U_13
_atom_site_aniso_U_23
 Pt1    0.0697(5)   0.0321(3)   0.0393(5)   -0.0002(4)  0.0007(4)
0.0023(3)  
 W1     0.0628(5)   0.0351(3)   0.0432(5)   -0.0043(4)  -0.0003(4)
0.0052(4)  
 W2     0.1090(7)   0.0458(4)   0.0358(5)   -0.0090(5)  0.0029(5)
-0.0035(4) 
 S1     0.075(3)    0.034(2)    0.062(4)    0.006(2)    0.004(3)
-0.005(2)  
 S2     0.171(6)    0.041(2)    0.025(3)    -0.005(3)   -0.001(3)
-0.002(2)  
 S3     0.089(4)    0.057(3)    0.058(4)    -0.017(3)   -0.019(3)
0.009(3)   
 S4     0.081(4)    0.066(3)    0.085(5)    -0.006(3)   0.024(3)
-0.017(3)  
 S5     0.077(4)    0.044(3)    0.093(5)    0.002(3)    0.005(3)
0.018(3)   
 S6     0.075(4)    0.048(3)    0.118(6)    -0.014(3)   -0.012(4)
0.014(3)   
 S7     0.230(8)    0.089(4)    0.060(5)    -0.010(5)   -0.037(5)
-0.014(4)  
 S8     0.212(8)    0.131(6)    0.060(5)    -0.013(5)   0.046(5)
-0.038(4)  
 P1     0.055(3)    0.034(2)    0.042(3)    -0.001(2)   0.000(2)
0.003(2)   
 N1     0.11(1)     0.036(9)    0.11(2)     -0.007(10)  0.01(1)
0.020(9)   
 N2     0.41(6)     0.10(2)     0.08(2)     -0.02(3)    0.08(3)
-0.02(2)   
 C1     0.06(1)     0.029(8)    0.05(1)     0.000(8)    0.01(1)
0.004(8)   
 C2     0.05(1)     0.09(1)     0.07(2)     0.01(1)     -0.01(1)    0.01(1)
   
 C3     0.09(2)     0.09(2)     0.08(2)     0.01(1)     -0.03(1)    0.01(1)
   
 C4     0.07(2)     0.09(2)     0.10(2)     0.01(1)     0.00(2)     0.00(2)
   
 C5     0.06(2)     0.08(1)     0.13(2)     0.03(1)     0.03(2)     0.01(2)
   
 C6     0.08(1)     0.05(1)     0.06(2)     0.00(1)     0.00(1)
-0.001(10) 
 C7     0.05(1)     0.044(9)    0.03(1)     0.007(9)    0.003(8)
0.014(9)   
 C8     0.11(2)     0.06(1)     0.03(1)     -0.01(1)    0.01(1)
-0.008(9)  
 C9     0.11(2)     0.05(1)     0.06(2)     0.00(1)     0.00(1)     0.00(1)
   
 C10    0.07(2)     0.09(1)     0.04(1)     0.03(1)     0.00(1)
-0.01(1)   
 C11    0.06(1)     0.10(2)     0.06(2)     0.01(1)     0.01(1)     0.02(1)
   
 C12    0.05(1)     0.05(1)     0.06(1)     0.010(9)    0.00(1)
0.005(10)  
 C13    0.05(1)     0.037(9)    0.03(1)     -0.008(8)   0.004(8)
0.001(7)   
 C14    0.06(1)     0.042(9)    0.05(1)     -0.002(9)   0.000(9)
0.008(9)   
 C15    0.08(1)     0.035(10)   0.08(2)     0.00(1)     0.00(1)
0.005(9)   
 C16    0.08(2)     0.06(1)     0.09(2)     -0.03(1)    0.00(1)     0.00(1)
   
 C17    0.05(1)     0.08(1)     0.08(2)     -0.01(1)    -0.02(1)    0.00(1)
   
 C18    0.05(1)     0.04(1)     0.09(2)     0.004(9)    0.00(1)
0.009(10)  
 C19    0.11(2)     0.043(9)    0.016(10)   -0.015(10)  0.017(9)
0.002(8)   
 C20    0.18(2)     0.03(1)     0.10(2)     0.03(1)     0.04(2)     0.00(1)
   
 C21    0.19(3)     0.09(2)     0.11(2)     0.02(2)     0.01(2)     0.04(2)
   
 C22    0.14(2)     0.08(2)     0.15(3)     0.01(2)     -0.01(2)
-0.03(2)   
 C23    0.21(3)     0.16(3)     0.17(4)     -0.04(2)    0.04(3)
-0.03(3)   
 C24    0.28(4)     0.08(2)     0.07(2)     -0.01(2)    0.06(2)
-0.01(2)   
 C25    0.5(1)      0.17(4)     0.18(5)     -0.06(5)    -0.14(5)
-0.09(4)   
 C26    0.23(6)     0.25(7)     0.22(8)     -0.05(6)    0.01(5)
-0.13(7)   
 C27    0.3(1)      0.3(1)      0.3(1)      0.0(1)      0.1(1)      -0.2(1)
   
 C28    0.5(1)      0.15(5)     0.19(6)     -0.11(6)    0.17(7)
-0.11(5)   
 C29    0.33(9)     0.16(6)     0.5(1)      0.02(7)     0.16(9)
-0.21(8)   
 C30    0.4(2)      0.14(9)     0.2(1)      -0.01(8)    0.07(10)
-0.12(9)   
#---------------------------------------------------------------------------
---
_refine_special_details                ?
_refine_ls_structure_factor_coef       F
_refine_ls_matrix_type                 full
_refine_ls_weighting_scheme            sigma
_refine_ls_hydrogen_treatment          ?
_refine_ls_extinction_method           Zachariasen_type_2_Gaussian_isotropic
_refine_ls_extinction_coef             0.00000
_refine_ls_abs_structure_details       ?
_refine_ls_abs_structure_Flack         ?
_refine_ls_number_reflns               4420
_refine_ls_number_parameters           397
_refine_ls_number_restraints           0
_refine_ls_number_constraints          ?
_refine_ls_R_factor_all                ?
_refine_ls_R_factor_obs                0.0520
_refine_ls_wR_factor_all               ?
_refine_ls_wR_factor_obs               0.0380
_refine_ls_goodness_of_fit_all         ?
_refine_ls_goodness_of_fit_obs         2.960
_refine_ls_shift/esd_max               0.2260
_refine_ls_shift/esd_mean              ?
_refine_diff_density_min               2.52560
_refine_diff_density_max               -1.86660
#---------------------------------------------------------------------------
---
_geom_special_details                  ?
loop_
_geom_bond_atom_site_label_1
_geom_bond_atom_site_label_2
_geom_bond_distance
_geom_bond_site_symmetry_1
_geom_bond_site_symmetry_2
_geom_bond_publ_flag
    Pt(1)     W(1)      2.787(1)   ? ? yes
    Pt(1)     W(2)      2.796(1)   ? ? yes
    Pt(1)     S(1)      2.271(4)   ? ? yes
    Pt(1)     S(2)      2.269(4)   ? ? yes
    Pt(1)     P(1)      2.266(4)   ? ? yes
    W(1)      W(2)      2.698(1)   ? ? yes
    W(1)      S(1)      2.191(5)   ? ? yes
    W(1)      S(3)      2.321(4)   ? ? yes
    W(1)      S(4)      2.320(5)   ? ? yes
    W(1)      S(5)      2.483(4)   ? ? yes
    W(1)      S(6)      2.472(4)   ? ? yes
    W(2)      S(2)      2.182(4)   ? ? yes
    W(2)      S(3)      2.311(5)   ? ? yes
    W(2)      S(4)      2.316(5)   ? ? yes
    W(2)      S(7)      2.457(6)   ? ? yes
    W(2)      S(8)      2.458(6)   ? ? yes
    S(5)      C(19)     1.72(2)    ? ? yes
    S(6)      C(19)     1.76(2)    ? ? yes
    S(7)      C(24)     1.73(3)    ? ? yes
    S(8)      C(24)     1.66(3)    ? ? yes
    P(1)      C(1)      1.84(2)    ? ? yes
    P(1)      C(7)      1.82(2)    ? ? yes
    P(1)      C(13)     1.83(1)    ? ? yes
    N(1)      C(19)     1.30(2)    ? ? yes
    N(1)      C(20)     1.45(2)    ? ? yes
    N(1)      C(22)     1.55(3)    ? ? yes
    N(2)      C(24)     1.38(3)    ? ? yes
    N(2)      C(25)     1.48(6)    ? ? yes
    N(2)      C(28)     1.42(8)    ? ? yes
    C(1)      C(2)      1.33(2)    ? ? yes
    C(1)      C(6)      1.41(2)    ? ? yes
    C(2)      C(3)      1.41(2)    ? ? yes
    C(3)      C(4)      1.39(3)    ? ? yes
    C(4)      C(5)      1.36(3)    ? ? yes
    C(5)      C(6)      1.37(2)    ? ? yes
    C(7)      C(8)      1.40(2)    ? ? yes
    C(7)      C(12)     1.37(2)    ? ? yes
    C(8)      C(9)      1.38(2)    ? ? yes
    C(9)      C(10)     1.35(2)    ? ? yes
    C(10)     C(11)     1.38(2)    ? ? yes
    C(11)     C(12)     1.38(2)    ? ? yes
    C(13)     C(14)     1.39(2)    ? ? yes
    C(13)     C(18)     1.36(2)    ? ? yes
    C(14)     C(15)     1.39(2)    ? ? yes
    C(15)     C(16)     1.35(2)    ? ? yes
    C(16)     C(17)     1.36(2)    ? ? yes
    C(17)     C(18)     1.37(2)    ? ? yes
    C(20)     C(21)     1.46(3)    ? ? yes
    C(22)     C(23)     1.44(3)    ? ? yes
    C(25)     C(26)     1.27(7)    ? ? yes
    C(25)     C(27)     1.6(1)     ? ? yes
    C(28)     C(29)     1.34(10)   ? ? yes
    C(28)     C(30)     1.2(1)     ? ? yes
#---------------------------------------------------------------------------
---
loop_
_geom_angle_atom_site_label_1
_geom_angle_atom_site_label_2
_geom_angle_atom_site_label_3
_geom_angle
_geom_angle_site_symmetry_1
_geom_angle_site_symmetry_2
_geom_angle_site_symmetry_3
_geom_bond_publ_flag
   W(1)      Pt(1)     W(2)      57.79(3)   ? ? ? yes
   W(1)      Pt(1)     S(1)      50.1(1)    ? ? ? yes
   W(1)      Pt(1)     S(2)      107.4(1)   ? ? ? yes
   W(1)      Pt(1)     P(1)      155.8(1)   ? ? ? yes
   W(2)      Pt(1)     S(1)      107.9(1)   ? ? ? yes
   W(2)      Pt(1)     S(2)      49.7(1)    ? ? ? yes
   W(2)      Pt(1)     P(1)      144.3(1)   ? ? ? yes
   S(1)      Pt(1)     S(2)      157.2(2)   ? ? ? yes
   S(1)      Pt(1)     P(1)      106.9(2)   ? ? ? yes
   S(2)      Pt(1)     P(1)      95.9(2)    ? ? ? yes
   Pt(1)     W(1)      W(2)      61.28(3)   ? ? ? yes
   Pt(1)     W(1)      S(1)      52.64(10)  ? ? ? yes
   Pt(1)     W(1)      S(3)      86.2(1)    ? ? ? yes
   Pt(1)     W(1)      S(4)      83.3(1)    ? ? ? yes
   Pt(1)     W(1)      S(5)      136.4(1)   ? ? ? yes
   Pt(1)     W(1)      S(6)      136.2(1)   ? ? ? yes
   W(2)      W(1)      S(1)      113.9(1)   ? ? ? yes
   W(2)      W(1)      S(3)      54.2(1)    ? ? ? yes
   W(2)      W(1)      S(4)      54.4(1)    ? ? ? yes
   W(2)      W(1)      S(5)      134.1(1)   ? ? ? yes
   W(2)      W(1)      S(6)      132.1(1)   ? ? ? yes
   S(1)      W(1)      S(3)      117.3(2)   ? ? ? yes
   S(1)      W(1)      S(4)      114.3(2)   ? ? ? yes
   S(1)      W(1)      S(5)      97.0(2)    ? ? ? yes
   S(1)      W(1)      S(6)      98.5(2)    ? ? ? yes
   S(3)      W(1)      S(4)      103.0(2)   ? ? ? yes
   S(3)      W(1)      S(5)      82.1(2)    ? ? ? yes
   S(3)      W(1)      S(6)      137.1(2)   ? ? ? yes
   S(4)      W(1)      S(5)      140.2(2)   ? ? ? yes
   S(4)      W(1)      S(6)      81.0(2)    ? ? ? yes
   S(5)      W(1)      S(6)      70.1(2)    ? ? ? yes
   Pt(1)     W(2)      W(1)      60.93(3)   ? ? ? yes
   Pt(1)     W(2)      S(2)      52.5(1)    ? ? ? yes
   Pt(1)     W(2)      S(3)      86.2(1)    ? ? ? yes
   Pt(1)     W(2)      S(4)      83.2(1)    ? ? ? yes
   Pt(1)     W(2)      S(7)      139.0(2)   ? ? ? yes
   Pt(1)     W(2)      S(8)      132.9(2)   ? ? ? yes
   W(1)      W(2)      S(2)      113.3(1)   ? ? ? yes
   W(1)      W(2)      S(3)      54.5(1)    ? ? ? yes
   W(1)      W(2)      S(4)      54.5(1)    ? ? ? yes
   W(1)      W(2)      S(7)      134.2(2)   ? ? ? yes
   W(1)      W(2)      S(8)      134.1(2)   ? ? ? yes
   S(2)      W(2)      S(3)      113.8(2)   ? ? ? yes
   S(2)      W(2)      S(4)      117.0(2)   ? ? ? yes
   S(2)      W(2)      S(7)      97.2(2)    ? ? ? yes
   S(2)      W(2)      S(8)      97.2(2)    ? ? ? yes
   S(3)      W(2)      S(4)      103.4(2)   ? ? ? yes
   S(3)      W(2)      S(7)      82.5(2)    ? ? ? yes
   S(3)      W(2)      S(8)      140.7(2)   ? ? ? yes
   S(4)      W(2)      S(7)      137.7(2)   ? ? ? yes
   S(4)      W(2)      S(8)      81.6(2)    ? ? ? yes
   S(7)      W(2)      S(8)      69.5(3)    ? ? ? yes
   Pt(1)     S(1)      W(1)      77.3(1)    ? ? ? yes
   Pt(1)     S(2)      W(2)      77.8(1)    ? ? ? yes
   W(1)      S(3)      W(2)      71.3(1)    ? ? ? yes
   W(1)      S(4)      W(2)      71.2(1)    ? ? ? yes
   W(1)      S(5)      C(19)     90.0(6)    ? ? ? yes
   W(1)      S(6)      C(19)     89.3(5)    ? ? ? yes
   W(2)      S(7)      C(24)     88(1)      ? ? ? yes
   W(2)      S(8)      C(24)     90(1)      ? ? ? yes
   Pt(1)     P(1)      C(1)      110.6(6)   ? ? ? yes
   Pt(1)     P(1)      C(7)      121.5(5)   ? ? ? yes
   Pt(1)     P(1)      C(13)     113.1(5)   ? ? ? yes
   C(1)      P(1)      C(7)      102.5(7)   ? ? ? yes
   C(1)      P(1)      C(13)     104.6(7)   ? ? ? yes
   C(7)      P(1)      C(13)     102.8(7)   ? ? ? yes
   C(19)     N(1)      C(20)     120(1)     ? ? ? yes
   C(19)     N(1)      C(22)     122(1)     ? ? ? yes
   C(20)     N(1)      C(22)     116(1)     ? ? ? yes
   C(24)     N(2)      C(25)     128(4)     ? ? ? yes
   C(24)     N(2)      C(28)     117(4)     ? ? ? yes
   C(25)     N(2)      C(28)     114(3)     ? ? ? yes
   P(1)      C(1)      C(2)      122(1)     ? ? ? yes
   P(1)      C(1)      C(6)      117(1)     ? ? ? yes
   C(2)      C(1)      C(6)      119(1)     ? ? ? yes
   C(1)      C(2)      C(3)      119(1)     ? ? ? yes
   C(2)      C(3)      C(4)      119(2)     ? ? ? yes
   C(3)      C(4)      C(5)      120(2)     ? ? ? yes
   C(4)      C(5)      C(6)      119(2)     ? ? ? yes
   C(1)      C(6)      C(5)      120(1)     ? ? ? yes
   P(1)      C(7)      C(8)      118(1)     ? ? ? yes
   P(1)      C(7)      C(12)     123(1)     ? ? ? yes
   C(8)      C(7)      C(12)     118(1)     ? ? ? yes
   C(7)      C(8)      C(9)      119(1)     ? ? ? yes
   C(8)      C(9)      C(10)     121(1)     ? ? ? yes
   C(9)      C(10)     C(11)     118(1)     ? ? ? yes
   C(10)     C(11)     C(12)     120(1)     ? ? ? yes
   C(7)      C(12)     C(11)     120(1)     ? ? ? yes
   P(1)      C(13)     C(14)     122(1)     ? ? ? yes
   P(1)      C(13)     C(18)     119(1)     ? ? ? yes
   C(14)     C(13)     C(18)     118(1)     ? ? ? yes
   C(13)     C(14)     C(15)     120(1)     ? ? ? yes
   C(14)     C(15)     C(16)     119(1)     ? ? ? yes
   C(15)     C(16)     C(17)     120(1)     ? ? ? yes
   C(16)     C(17)     C(18)     120(1)     ? ? ? yes
   C(13)     C(18)     C(17)     120(1)     ? ? ? yes
   S(5)      C(19)     S(6)      110.0(8)   ? ? ? yes
   S(5)      C(19)     N(1)      125(1)     ? ? ? yes
   S(6)      C(19)     N(1)      123(1)     ? ? ? yes
   N(1)      C(20)     C(21)     111(1)     ? ? ? yes
   N(1)      C(22)     C(23)     107(2)     ? ? ? yes
   S(7)      C(24)     S(8)      111(1)     ? ? ? yes
   S(7)      C(24)     N(2)      119(3)     ? ? ? yes
   S(8)      C(24)     N(2)      128(2)     ? ? ? yes
   N(2)      C(25)     C(26)     106(5)     ? ? ? yes
   N(2)      C(25)     C(27)     119(5)     ? ? ? yes
   C(26)     C(25)     C(27)     133(7)     ? ? ? yes
   N(2)      C(28)     C(29)     115(6)     ? ? ? yes
   N(2)      C(28)     C(30)     116(9)     ? ? ? yes
   C(29)     C(28)     C(30)     124(13)    ? ? ? yes
#---------------------------------------------------------------------------
---
_publ_requested_journal               ' Inorg. Chem. '

_publ_contact_author
;
    Masanobu Hidai
 Department of Chemstry and Biotechnology, Graduate Scool of Engineering,
The University of Tokyo, Hongo, Tokyo 113-8656, Japan
;
_publ_contact_letter
;
   -
;

_publ_requested_coeditor_name          ?
_publ_contact_author_phone            ' 81-3-5800-6945 '
_publ_contact_author_fax              ' 81-3-5800-6945 '
_publ_contact_author_email            ' ENTER EMAIL ADDRESS '
loop_
_publ_author_name
_publ_author_address
' Tomotake Ikada '
;
  Institute of Industrial Science, The University of Tokyo, Roppongi,
Minato-ku, Tokyo 106-8558, Japan
;

_publ_section_title
;
    Syntheses and Structures of Mixed-Metal Sulfido Clusters Containing
Trimetallic M2M'S4 (M = Mo, W; M' = Pd, Pt) and Tetrametallic Cubane-Type
Mo2Pd2S4 Cores
;

_publ_section_abstract
;
    -
;

_publ_section_experimental
;
    -
;

_publ_section_comment
;
    -
;

_publ_section_references
;
    -
;

_publ_section_figure_captions
;
    -
;
